# Supplementary material for: Gene network requirements for regulation of metabolic gene expression to a desired state
Source: PubMed Central journal article supplement (PMC3593220; doi:10.1038/srep01417), 2013-03-11
Supplement: srep01417-s1.pdf [file srep01417-s1.pdf]

# Gene network requirements and limits for regulating metabolic gene expression to a desired state

Jan Berkhout<sup>1,2</sup>, Bas Teusink<sup>1,2,3</sup>, Frank J. Bruggeman<sup>1,3,4,\*</sup>

1. Systems Bioinformatics, IBIVU, Vrije Universiteit, Amsterdam, The Netherlands
2. Kluyver Centre for Genomics of Industrial Fermentation, The Netherlands
3. Netherlands Institute for Systems Biology, Amsterdam, The Netherlands
4. Life Sciences, Centre for Mathematics and Computer Science (CWI), Amsterdam, The Netherlands

\* Corresponding author: f.j.bruggeman@vu.nl

## Supplementary Figure 1

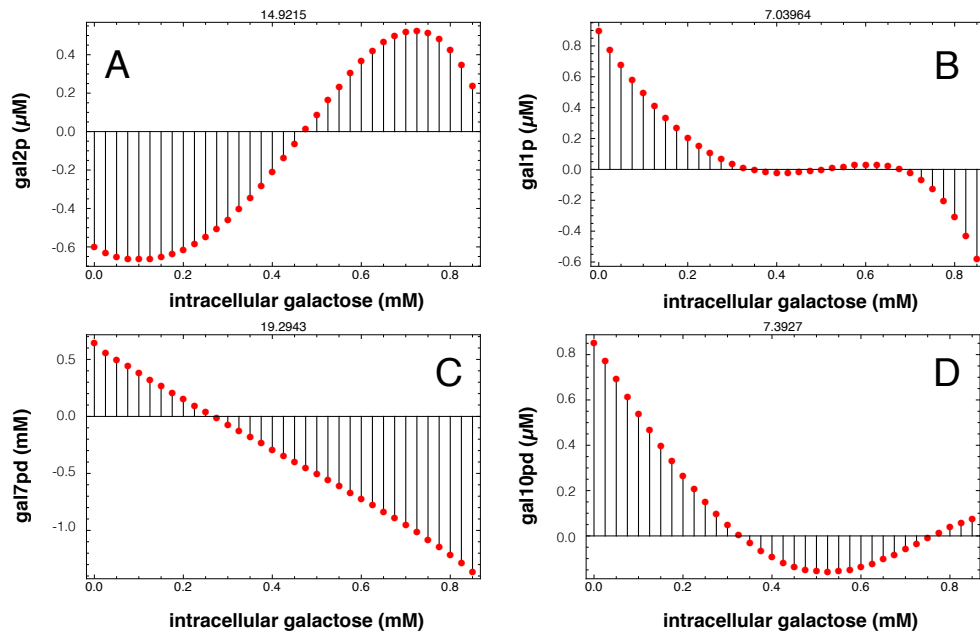

Figure S1: **Residuals of the gene network fit.** Shown are the residuals, in  $\mu\text{M}$ , for the four metabolic enzymes as function of intracellular galactose. The number on top of each graph represents the sum over all internal galactose concentration of all residuals for that enzyme. A gal2p; B gal1p; C gal7pd; D gal10pd.

# Supplementary Table 1

Table S1: Fitted parameter values of the gene network.

| parameter    | description                                                     | value                  | unit                                       | # in Fig. 6 |
|--------------|-----------------------------------------------------------------|------------------------|--------------------------------------------|-------------|
| idg10d       | intrinsic degradation constant of gal10pd                       | $1.851 \times 10^{-1}$ | $\text{min}^{-1}$                          | 37          |
| idg10        | intrinsic degradation constant of gal10p                        | $5.150 \times 10^{-1}$ | $\text{min}^{-1}$                          | 44          |
| idg1         | intrinsic degradation constant of gal1p                         | $2.650 \times 10^{-1}$ | $\text{min}^{-1}$                          | 42          |
| idg2         | intrinsic degradation constant of gal2p                         | $2.727 \times 10^{-1}$ | $\text{min}^{-1}$                          | 1           |
| idg3i        | intrinsic degradation constant of gal3p*                        | 1.010                  | $\text{min}^{-1}$                          | 18          |
| idg3         | intrinsic degradation constant of gal3p                         | 1.065                  | $\text{min}^{-1}$                          | 8           |
| idg4dg80d    | intrinsic degradation constant of gal4pd-gal80pd complex        | 1.537                  | $\text{min}^{-1}$                          | 22          |
| idg4d        | intrinsic degradation constant of gal4pd                        | 1.050                  | $\text{min}^{-1}$                          | 23          |
| idg4         | intrinsic degradation constant of gal4p                         | 1.167                  | $\text{min}^{-1}$                          | 19          |
| idg7d        | intrinsic degradation constant of gal7pd                        | $2.952 \times 10^{-1}$ | $\text{min}^{-1}$                          | 38          |
| idg7         | intrinsic degradation constant of gal7p                         | 2.252                  | $\text{min}^{-1}$                          | 36          |
| idg80d       | intrinsic degradation constant of gal80pd                       | 2.518                  | $\text{min}^{-1}$                          | 32          |
| idg80g3i     | intrinsic degradation constant of gal80p-gal3p* complex         | 1.331                  | $\text{min}^{-1}$                          | 47          |
| idg80        | intrinsic degradation constant of gal80p                        | 1.996                  | $\text{min}^{-1}$                          | 45          |
| idr10        | intrinsic degradation constant of <i>GAL10</i>                  | 5.997                  | $\text{min}^{-1}$                          | 41          |
| idr1         | intrinsic degradation constant of <i>GAL1</i>                   | 4.889                  | $\text{min}^{-1}$                          | 43          |
| idr2         | intrinsic degradation constant of <i>GAL2</i>                   | $9.803 \times 10^{-2}$ | $\text{min}^{-1}$                          | 2           |
| idr3         | intrinsic degradation constant of <i>GAL3</i>                   | $2.549 \times 10^1$    | $\text{min}^{-1}$                          | 5           |
| idr7         | intrinsic degradation constant of <i>GAL7</i>                   | 5.984                  | $\text{min}^{-1}$                          | 40          |
| idr80        | intrinsic degradation constant of <i>GAL80</i>                  | $8.584 \times 10^1$    | $\text{min}^{-1}$                          | 52          |
| kfv3i        | association rate constant of Gal <sub>in</sub> -gal3p complex   | $2.788 \times 10^{-4}$ | $(\text{m}/\text{c})^{-1} \text{min}^{-1}$ | 48          |
| kfv10d       | association rate constant of gal10p-gal10p dimer                | $1.835 \times 10^{-1}$ | $(\text{m}/\text{c})^{-1} \text{min}^{-1}$ | 17          |
| kfv4dg80d    | association rate constant of Gal <sub>in</sub> -gal3p complex   | $1.505 \times 10^2$    | $(\text{m}/\text{c})^{-1} \text{min}^{-1}$ | 21          |
| kfv4d        | association rate constant of gal4p-gal4p dimer                  | $2.163 \times 10^1$    | $(\text{m}/\text{c})^{-1} \text{min}^{-1}$ | 31          |
| kfv7d        | association rate constant of gal7p-gal7p dimer                  | 4.729                  | $(\text{m}/\text{c})^{-1} \text{min}^{-1}$ | 20          |
| kfv80d       | association rate constant of gal80p-gal80p dimer                | 9.641                  | $(\text{m}/\text{c})^{-1} \text{min}^{-1}$ | 10          |
| kfv80g3i     | association rate constant of gal80p-gal3p* complex              | 9.353                  | $(\text{m}/\text{c})^{-1} \text{min}^{-1}$ | 49          |
| kipg2        | maximum initiation rate constant of gal2p                       | $8.698 \times 10^2$    | $(\text{m}/\text{c})^{-1} \text{min}^{-1}$ | 53          |
| kipg3        | maximum initiation rate constant of gal3p                       | $4.419 \times 10^3$    | $(\text{m}/\text{c})^{-1} \text{min}^{-1}$ | 50          |
| kipg4        | maximum initiation rate constant of gal4p                       | $1.508 \times 10^1$    | $(\text{m}/\text{c})^{-1} \text{min}^{-1}$ | 35          |
| kipg80       | maximum initiation rate constant of gal80p                      | $3.117 \times 10^3$    | $(\text{m}/\text{c})^{-1} \text{min}^{-1}$ | 4           |
| kipstructg10 | maximum initiation rate constant of gal10p                      | $1.216 \times 10^4$    | $(\text{m}/\text{c})^{-1} \text{min}^{-1}$ | 16          |
| kipstructg1  | maximum initiation rate constant of gal1p                       | $1.398 \times 10^4$    | $(\text{m}/\text{c})^{-1} \text{min}^{-1}$ | 13          |
| kipstructg7  | maximum initiation rate constant of gal7p                       | $1.456 \times 10^4$    | $(\text{m}/\text{c})^{-1} \text{min}^{-1}$ | 11          |
| kir2         | maximum initiation rate constant of <i>GAL2</i>                 | $3.666 \times 10^1$    | $(\text{m}/\text{c})^{-1} \text{min}^{-1}$ | 54          |
| kir3         | maximum initiation rate constant of <i>GAL3</i>                 | $7.819 \times 10^2$    | $(\text{m}/\text{c})^{-1} \text{min}^{-1}$ | 51          |
| kir80        | maximum initiation rate constant of <i>GAL80</i>                | $2.392 \times 10^2$    | $(\text{m}/\text{c})^{-1} \text{min}^{-1}$ | 3           |
| kirstructr10 | maximum initiation rate constant of <i>GAL10</i>                | $3.154 \times 10^2$    | $(\text{m}/\text{c})^{-1} \text{min}^{-1}$ | 15          |
| kirstructr1  | maximum initiation rate constant of <i>GAL1</i>                 | $1.468 \times 10^2$    | $(\text{m}/\text{c})^{-1} \text{min}^{-1}$ | 14          |
| kirstructr7  | maximum initiation rate constant of <i>GAL7</i>                 | $1.928 \times 10^2$    | $(\text{m}/\text{c})^{-1} \text{min}^{-1}$ | 12          |
| Kpr10        | equilibrium constant for binding of gal4pd to <i>GAL10</i>      | $2.375 \times 10^1$    | -                                          | 28          |
| Kpr1         | equilibrium constant for binding of gal4pd to <i>GAL1</i>       | 8.628                  | -                                          | 26          |
| Kpr2         | equilibrium constant for binding of gal4pd to <i>GAL2</i>       | $4.254 \times 10^1$    | -                                          | 30          |
| Kpr3         | equilibrium constant for binding of gal4pd to <i>GAL3</i>       | 5.962                  | -                                          | 33          |
| Kpr7         | equilibrium constant for binding of gal4pd to <i>GAL7</i>       | $1.034 \times 10^1$    | -                                          | 27          |
| Kpr80        | equilibrium constant for binding of gal4pd to <i>GAL80</i>      | $3.482 \times 10^1$    | -                                          | 25          |
| Kq           | equilibrium constant for binding of gal80pd to gal4pd-DNA       | $1.555 \times 10^1$    | -                                          | 9           |
| krvg3i       | dissociation rate constant of Gal <sub>in</sub> -gal3p complex0 | $3.493 \times 10^5$    | $\text{min}^{-1}$                          | 7           |
| krvg10d      | dissociation rate constant of gal10p-gal10p dimer               | $1.564 \times 10^5$    | $\text{min}^{-1}$                          | 39          |
| krvg4dg80d   | dissociation rate constant of Gal <sub>in</sub> -gal3p complex  | $6.405 \times 10^1$    | $\text{min}^{-1}$                          | 29          |
| krvg4d       | dissociation rate constant of gal4p-gal4p dimer                 | $1.681 \times 10^2$    | $\text{min}^{-1}$                          | 24          |
| krvg7d       | dissociation rate constant of gal7p-gal7p dimer                 | $1.860 \times 10^3$    | $\text{min}^{-1}$                          | 34          |
| krvg80d      | dissociation rate constant of gal80p-gal80p dimer               | $5.982 \times 10^4$    | $\text{min}^{-1}$                          | 46          |
| krvg80g3i    | dissociation rate constant of gal80p-gal3p* complex             | $1.489 \times 10^2$    | $\text{min}^{-1}$                          | 6           |

## Supplementary Figure 2

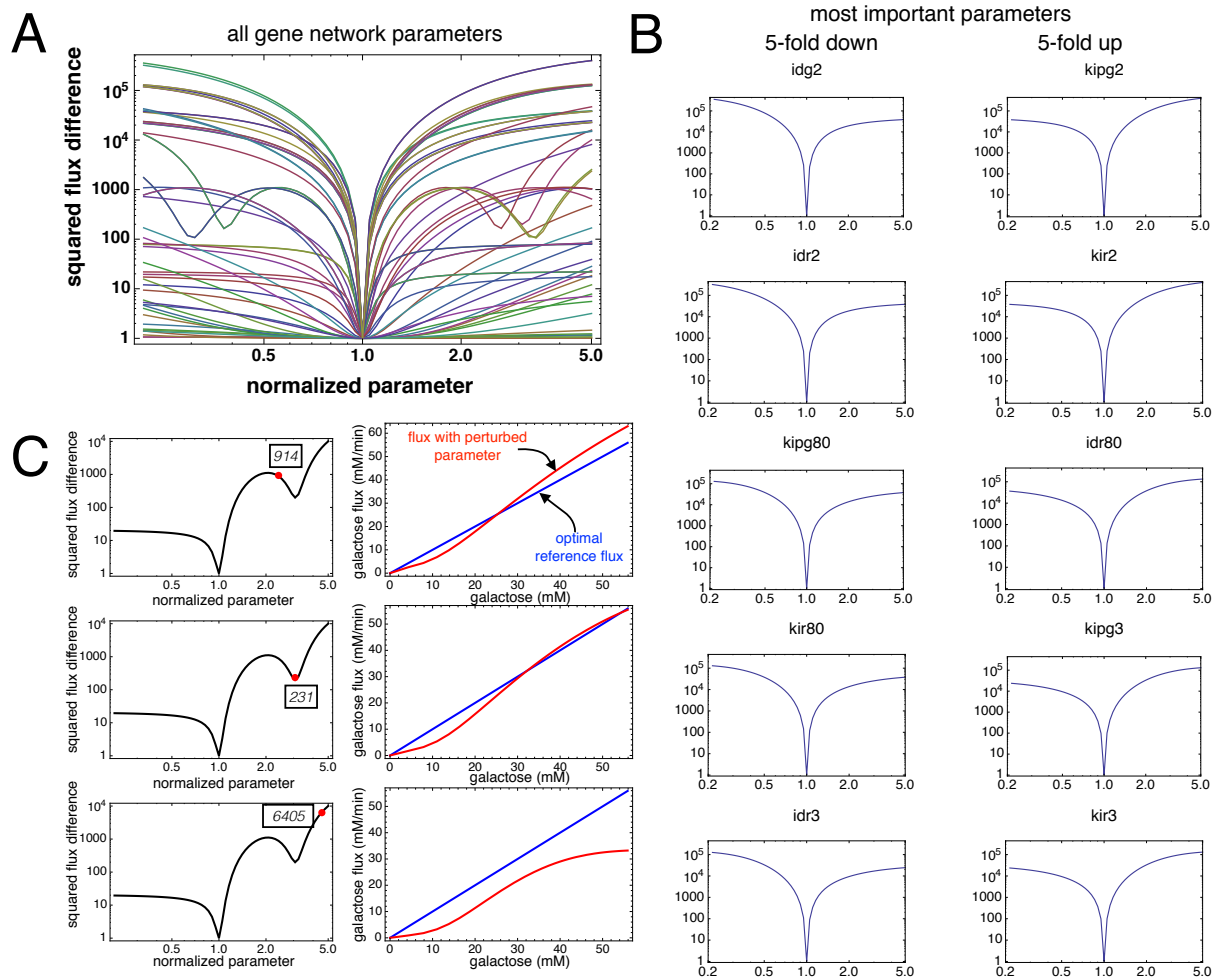

Figure S2: **The effect of perturbation of gene network parameters on metabolic steady state flux.** (A) For every parameter in  $\mathbf{p}_g^o$  a reference flux profile for a galactose range of 0 and 50 mM was calculated. The squared distance of this reference flux profile and the flux profile with the perturbed value is plotted for all gene network parameters. (B) The five parameters that have the biggest effect on the galactose flux profile are shown. Left column corresponds to the highest effect when the indicated parameter was perturbed 5-fold down. Right column corresponds to the highest effect when the indicated parameter was perturbed 5-fold up. (C) Explanation of occurrence of multiple minima for some of the gene network parameters, using parameter idg10 as an example. For three values of parameter idg10 (indicated by the red circles), the corresponding galactose flux profiles (red) are shown together with the reference flux profile (blue) in the right columns. The squared flux difference that corresponds with the perturbed value is shown in the black box of every plot.
